# Supplementary material for: Habitual Night Eating Was Positively Associated With Progress of Arterial Stiffness in Chinese Adults
Source: PubMed Central journal article supplement — J Am Heart Assoc. 2020 Sep 21;9(19):e016455. doi: 10.1161/JAHA.120.016455 (PMC7792372; doi:10.1161/jaha.120.016455), 2020-09-21
Supplement: JAH3-9-e016455-s001.pdf [file JAH3-9-e016455-s001.pdf]

# **Supplemental Material**

**Table S1. Adjusted mean  $\pm$  standard error of brachial-ankle pulse wave velocity change rate (cm/s per year) across night eating habits in women, men, and total participants.**

|                 | Never or rarely  | Some days       | Most days       | p for trend |
|-----------------|------------------|-----------------|-----------------|-------------|
| Women (n=2,222) |                  |                 |                 |             |
| Model 1         | 14.2 $\pm$ 3.0   | 50.3 $\pm$ 12.3 | 41.4 $\pm$ 13.6 | 0.003       |
| Model 2         | 13.0 $\pm$ 3.2   | 51.8 $\pm$ 12.8 | 42.8 $\pm$ 14.0 | 0.002       |
| Model 3         | 36.0 $\pm$ 25.6  | 70.2 $\pm$ 28.6 | 70.4 $\pm$ 29.1 | 0.002       |
| Model 4         | 31.2 $\pm$ 30.8  | 63.6 $\pm$ 32.4 | 66.3 $\pm$ 33.4 | 0.002       |
| Men (n=5,549)   |                  |                 |                 |             |
| Model 1         | 9.9 $\pm$ 2.1    | 13.4 $\pm$ 6.6  | 14.2 $\pm$ 6.8  | 0.47        |
| Model 2         | 10.1 $\pm$ 2.1   | 12.0 $\pm$ 6.7  | 14.1 $\pm$ 6.9  | 0.55        |
| Model 3         | -4.6 $\pm$ 22.9  | -4.8 $\pm$ 23.7 | 2.2 $\pm$ 24.0  | 0.43        |
| Model 4         | -12.6 $\pm$ 26.2 | -8.5 $\pm$ 26.5 | -6.3 $\pm$ 27.0 | 0.36        |
| Total (n=7,771) |                  |                 |                 |             |
| Model 1         | 6.6 $\pm$ 1.9    | 17.6 $\pm$ 5.9  | 16.5 $\pm$ 6.2  | 0.04        |
| Model 2         | 5.9 $\pm$ 1.9    | 16.3 $\pm$ 6.0  | 15.9 $\pm$ 6.3  | 0.04        |
| Model 3         | 20.3 $\pm$ 16.2  | 29.2 $\pm$ 17.1 | 34.6 $\pm$ 17.3 | 0.02        |
| Model 4         | 12.6 $\pm$ 18.7  | 24.8 $\pm$ 19.2 | 26.6 $\pm$ 19.6 | 0.01        |

Model 1 adjusted for age and sex;

Model 2 further adjusted for baseline baPWV, total energy intake (quartiles) and Dietary Approaches to Stop Hypertension score;

Model 3 further adjusted for physical activity (low, moderate, or high), marriage (single or married), employment (blue-collar or white-collar worker), education level (high school and below, or college and above), alcohol consumption (yes or no), smoking status (yes or no), antihypertensive drug (yes/no), body mass index (quintile), systolic blood pressure (quintile), fasting blood glucose (quintile), low-density lipoprotein-cholesterol (quintile) and high-density lipoprotein-cholesterol (quintile);

Model 4 further adjusted for sleep duration (h), insomnia (yes or no), snoring (yes or no), and breakfast frequency.

\*p-difference <0.05, compared to “never or rarely” ate at night group.

**Table S2. Adjusted difference of brachial-ankle pulse wave velocity change rate (cm/s per year) according to night eating frequency in women, stratified by menopause status.**

| Menopause status | Never or rarely         | Some days                  | Most days                 | p for trend | p for interaction |
|------------------|-------------------------|----------------------------|---------------------------|-------------|-------------------|
| No (n=1,345)     | n=1200<br>0 (reference) | n=88<br>11.6 (-37.2, 60.3) | n=57<br>37.8 (6.6, 69.0)* | 0.02        | 0.92              |
| Yes (n=438)      | n=412<br>0 (reference)  | n=11<br>34.3 (-137, 206)   | n=15<br>85.1 (-61.4, 232) | 0.19        |                   |

Model adjusted for age, baseline baPWV, total energy intake (quartiles), Dietary Approaches to Stop Hypertension (DASH) score, physical activity (low, moderate, or high), employment (blue-collar or white-collar worker), education level (high school and below, or college and above), alcohol consumption (yes or no), smoking status (yes or no), antihypertensive drug (yes/no), body mass index (quintile), systolic blood pressure (quintile), fasting blood glucose quintile, low-density lipoprotein-cholesterol (quintile), high-density lipoprotein-cholesterol (quintile), sleep duration (h), insomnia (yes or no), snoring (yes or no), and breakfast frequency;

\*p-difference <0.05, compared to “never or rarely” ate at night group.

**Table S3. Baseline characteristics comparison between women and men.**

|                                                  | Women<br>n=2222 | Men<br>n=5549 | P      |
|--------------------------------------------------|-----------------|---------------|--------|
| Age, y                                           | 46.4 ± 9.8      | 45.4 ± 10.5   | <0.001 |
| College or above, %                              | 32.7            | 10.4          | <0.001 |
| Manual labor, %                                  | 61.1            | 90.1          | <0.001 |
| Married, %                                       | 93.7            | 95.6          | 0.006  |
| Current smoker, %                                | 1.44            | 56.0          | <0.001 |
| Current drinker, %                               | 15.9            | 46.9          | <0.001 |
| Physical exercises, %                            | 19.6            | 16.3          | <0.001 |
| Antihypertensive drug, %                         | 8.0             | 10.3          | <0.001 |
| Sleep duration, h                                | 7.86 ± 1.40     | 7.87 ± 1.74   | 0.70   |
| Insomnia, %                                      | 8.9             | 3.8           | <0.001 |
| Frequent snore, %                                | 7.5             | 12.9          | <0.001 |
| Everyday breakfast, %                            | 92.2            | 76.7          | <0.001 |
| Total energy intake, kcal/d                      | 1564 ± 471      | 1720 ± 598    | <0.001 |
| DASH diet quality score                          | 26.6 ± 4.2      | 25.9 ± 4.8    | <0.001 |
| baPWV, cm/s                                      | 1302 ± 267      | 1447 ± 259    | <0.001 |
| Body mass index, kg/m <sup>2</sup>               | 24.0 ± 3.3      | 25.1 ± 3.2    | <0.001 |
| Systolic blood pressure, mmHg                    | 122 ± 16        | 133 ± 16      | <0.001 |
| Fasting blood glucose, mmol/L                    | 5.21 ± 0.59     | 5.34 ± 0.62   | <0.001 |
| Low-density lipoprotein-<br>cholesterol, mmol/L  | 2.83 ± 0.76     | 2.99 ± 0.76   | <0.001 |
| High-density lipoprotein-<br>cholesterol, mmol/L | 1.44 ± 0.41     | 1.39 ± 0.45   | <0.001 |

BaPWV, brachial-ankle pulse wave velocity; DASH, Dietary Approaches to Stop Hypertension.

**Table S4. Baseline characteristics across night eating habits in women versus men.**

|                                                  | Women, n=2222                        |                           |                          | Men, n=5549                          |                           |                           |
|--------------------------------------------------|--------------------------------------|---------------------------|--------------------------|--------------------------------------|---------------------------|---------------------------|
|                                                  | Never or rarely<br>N=2007<br>(90.3%) | Some days<br>N=119 (5.4%) | Most days<br>N=96 (4.3%) | Never or rarely<br>N=4618<br>(83.2%) | Some days<br>N=491 (8.9%) | Most days<br>N=440 (7.9%) |
| Age, y                                           | 46.7 ± 9.8                           | 42.2 ± 8.2                | 45.8 ± 10.1              | 45.9 ± 10.8                          | 42.5 ± 8.8                | 43.7 ± 9.1                |
| College or above, %                              | 32.0                                 | 52.6                      | 30.0                     | 10.9                                 | 9.1                       | 5.8                       |
| Manual labor, %                                  | 61.1                                 | 52.6                      | 69.7                     | 89.7                                 | 89.7                      | 94.9                      |
| Married, %                                       | 93.9                                 | 88.1                      | 94.4                     | 95.9                                 | 92.4                      | 94.7                      |
| Current smoker, %                                | 1.5                                  | 0.9                       | 0.0                      | 55.8                                 | 62.0                      | 51.5                      |
| Current drinker, %                               | 15.4                                 | 24.4                      | 15.2                     | 44.4                                 | 65.0                      | 53.0                      |
| Physical exercises, %                            | 19.2                                 | 21.1                      | 26.9                     | 26.6                                 | 25.1                      | 25.3                      |
| Antihypertensive drug, %                         | 8.4                                  | 4.3                       | 5.3                      | 10.9                                 | 7.2                       | 7.9                       |
| Sleep duration, h                                | 7.86 ± 1.37                          | 7.89 ± 1.51               | 7.84 ± 1.82              | 7.86 ± 1.72                          | 7.81 ± 1.72               | 8.10 ± 1.93               |
| Insomnia, %                                      | 8.6                                  | 12.7                      | 10.9                     | 2.9                                  | 10.7                      | 5.1                       |
| Frequent snore, %                                | 7.5                                  | 9.4                       | 5.8                      | 12.7                                 | 16.2                      | 12.2                      |
| Everyday breakfast, %                            | 93.2                                 | 74.8                      | 92.6                     | 78.3                                 | 58.3                      | 80.7                      |
| Total energy intake, kcal/d                      | 1564 ± 473                           | 1608 ± 491                | 1511 ± 412               | 1716 ± 593                           | 1754 ± 651                | 1724 ± 580                |
| DASH diet quality score                          | 26.6 ± 4.2                           | 26.6 ± 4.1                | 26.4 ± 4.8               | 25.8 ± 4.9                           | 26.0 ± 4.6                | 26.0 ± 4.6                |
| baPWV, cm/s                                      | 1304 ± 267                           | 1256 ± 214                | 1312 ± 309               | 1453 ± 266                           | 1416 ± 237                | 1420 ± 210                |
| Body mass index, kg/m <sup>2</sup>               | 24.1 ± 3.3                           | 23.8 ± 3.2                | 23.4 ± 3.4               | 25.2 ± 3.2                           | 25.2 ± 3.3                | 24.7 ± 3.0                |
| Systolic blood pressure, mmHg                    | 122 ± 16                             | 118 ± 13                  | 118 ± 17                 | 134 ± 16                             | 132 ± 15                  | 131 ± 14.4                |
| Fasting blood glucose, mmol/L                    | 5.22 ± 0.59                          | 5.14 ± 0.61               | 5.18 ± 0.62              | 5.35 ± 0.62                          | 5.28 ± 0.63               | 5.32 ± 0.61               |
| Low-density lipoprotein-<br>cholesterol, mmol/L  | 2.84 ± 0.77                          | 2.63 ± 0.70               | 2.88 ± 0.71              | 3.01 ± 0.76                          | 2.92 ± 0.76               | 2.86 ± 0.73               |
| High-density lipoprotein-<br>cholesterol, mmol/L | 1.43 ± 0.33                          | 1.50 ± 1.12               | 1.45 ± 0.31              | 1.40 ± 0.46                          | 1.37 ± 0.36               | 1.38 ± 0.35               |

BaPWV, brachial-ankle pulse wave velocity; DASH, Dietary Approaches to Stop Hypertension.
